# Supplementary material
Source: PubMed Central journal article supplement (PMC6148474)
Supplement: zjb999094870s1.pdf [file zjb999094870s1.pdf]

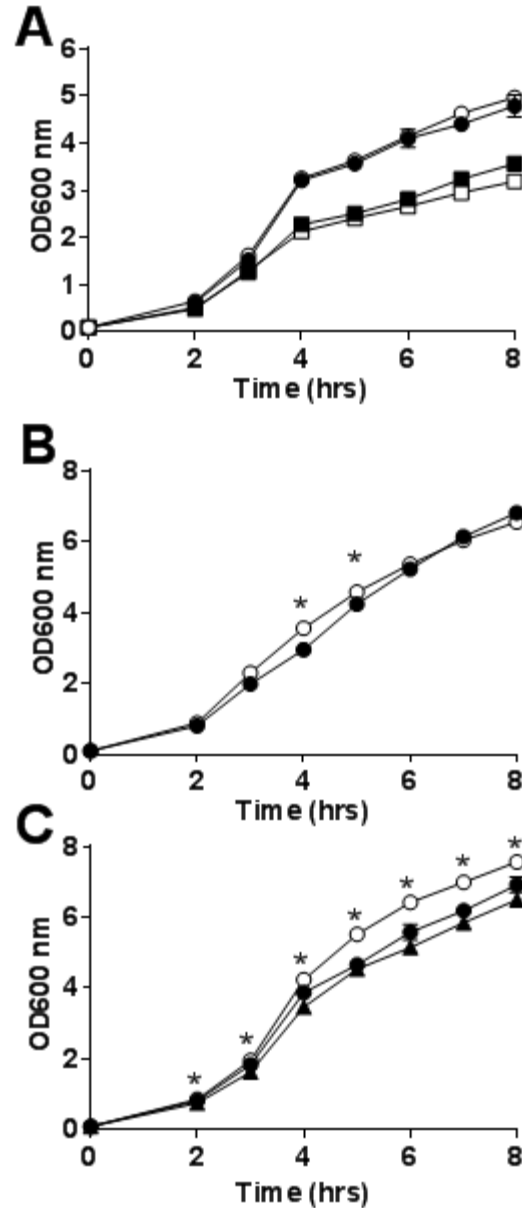

**Figure S1. (A)** Growth of wild-type (closed symbols) and *fakA* mutant (open symbols) in TSB + 14 mM glucose with 1:3.3 media to flask ratio (circles) and 1:1.66 flask to media ratio (squares). **(B)** Growth of wild-type (closed circle) and *fakA* mutant (open circle) in TSB without glucose. **(C)** Growth of wild-type (closed circle), *fakA* mutant (empty circle) and *fakA* complement (filled triangle) grown in TSB buffered with 50 mM MOPS. Data is the average (n=3) with standard deviation of a representative experiment. All points have error bars and may be smaller than symbols. \*denote significant difference ( $p < 0.05$ ) from wildtype using a t-test.

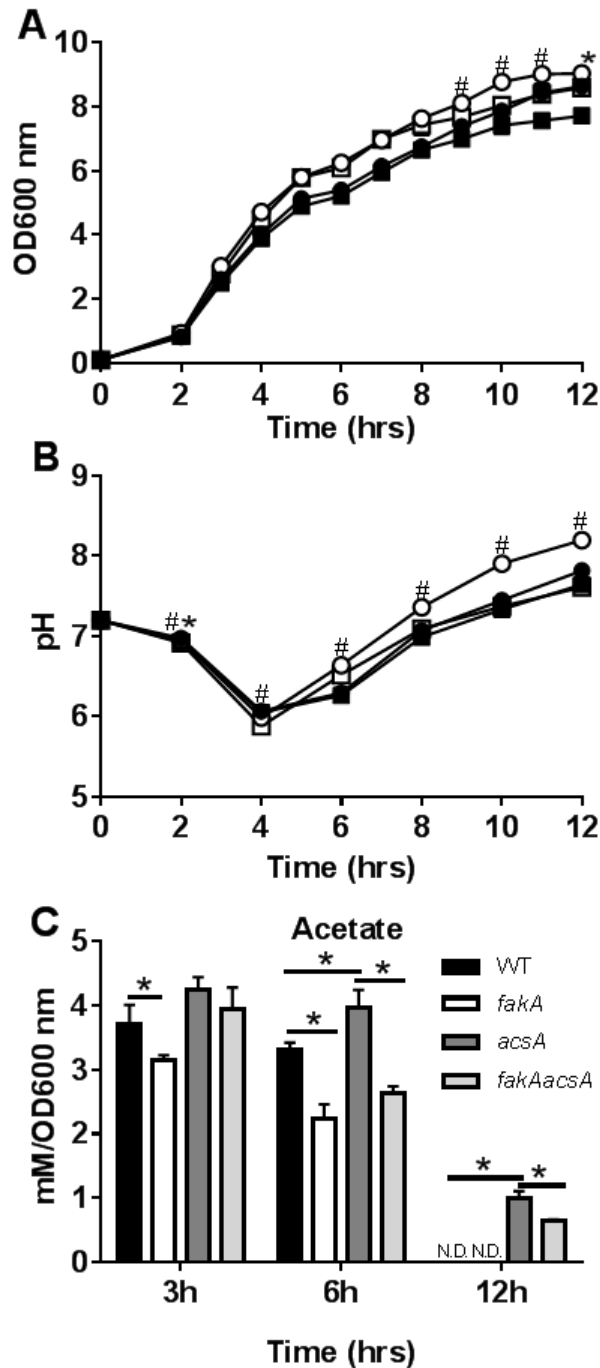

**Figure S2. (A)** Growth of wild-type (closed circle), *fakA* mutant (open circle), *acsA* mutant (closed square), and *fakA acsA* mutant (open square) **(B)** pH of culture from panel A. **(C)** Quantification of acetate in the culture media at indicated time points. Data is the average (n=3) with standard deviation of a representative experiment. For panels A and B, \*denotes significant difference ( $p < 0.05$ ) using a t-test for wild-type v.s. *acsA* mutant and “#” for *fakA* mutant v.s. *fakA acsA* mutant. For panel C, \*indicates significant differences ( $p < 0.05$ ) as indicated. ND indicates “not detected”.

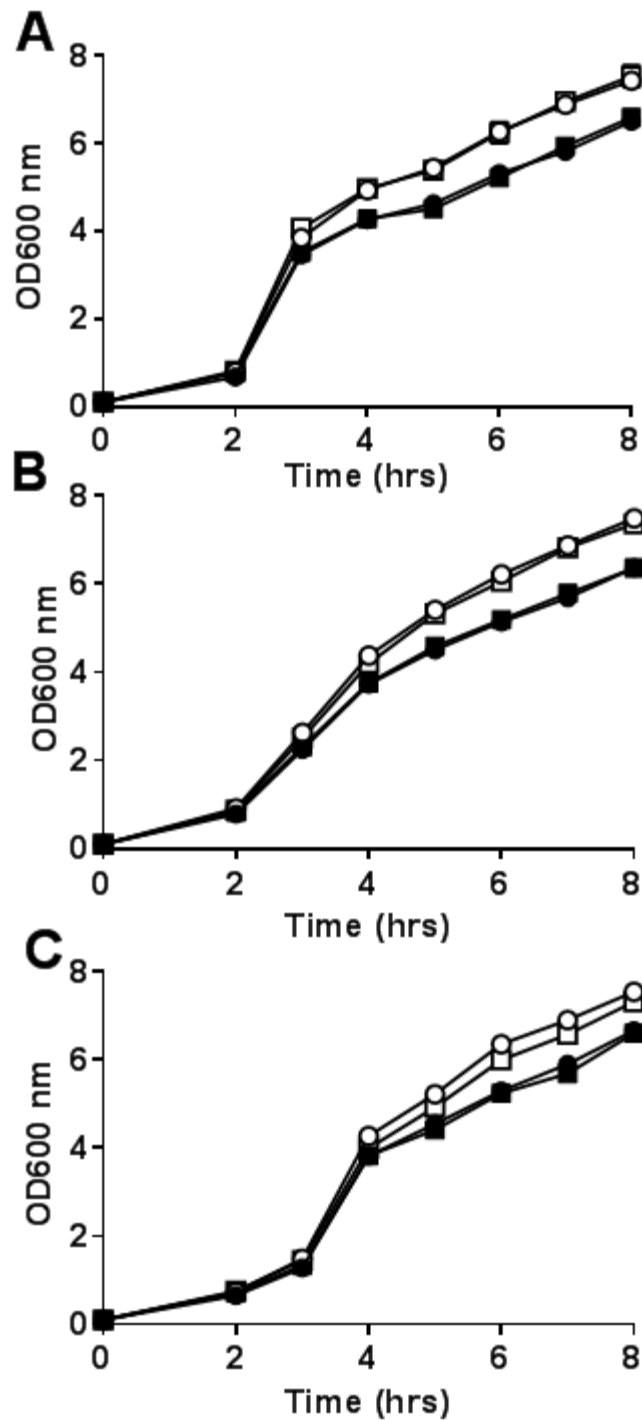

**Figure S3.** (A) Growth of wildtype (closed circles), *fakA* mutant (open circles), *ldh1* mutant (closed squares), and *fakA ldh1* mutant (open squares). (B) Growth of wildtype (closed circles), *fakA* mutant (open circles), *ldh2* mutant (closed squares), and *fakA ldh2* mutant (open squares) (C) Growth of wild-type (closed circles), *fakA* mutant (open circles), *alsS* mutant (closed squares), and *fakA alsS* mutant (open squares).

**Table S1. Quantification of organic acids.**

| Organic Acid <sup>a</sup> | Media             | Strain        | Cells <sup>b</sup> |              |        |              |
|---------------------------|-------------------|---------------|--------------------|--------------|--------|--------------|
|                           |                   |               | 3h                 | P-value      | 6h     | P-value      |
| α-ketoglutarate           | 3.22              | WT            | 1.62               | <u>0.029</u> | 0.45   | <u>0.011</u> |
|                           |                   | Δ <i>fakA</i> | 1.19               |              | 0.66   |              |
| β-hydroxybutyrate         | 80.70             | WT            | 2.42               | <u>0.037</u> | 4.12   | 0.061        |
|                           |                   | Δ <i>fakA</i> | 1.72               |              | 3.16   |              |
| acetyl-CoA                | n.d. <sup>c</sup> | WT            | 546.77             | 0.830        | 314.84 | 0.540        |
|                           |                   | Δ <i>fakA</i> | 560.95             |              | 406.66 |              |
| citrate                   | 16.00             | WT            | 1.71               | 0.053        | 0.85   | <u>0.032</u> |
|                           |                   | Δ <i>fakA</i> | 1.42               |              | 1.47   |              |
| fumarate                  | 6.56              | WT            | BLOQ               |              | 0.37   | 0.456        |
|                           |                   | Δ <i>fakA</i> | BLOQ               |              | 0.35   |              |
| lactate                   | 77.30             | WT            | 343.36             | <u>0.014</u> | 27.54  | 0.278        |
|                           |                   | Δ <i>fakA</i> | 474.73             |              | 24.86  |              |
| malate                    | 702.44            | WT            | 1.15               |              | BLOQ   |              |
|                           |                   | Δ <i>fakA</i> | BLOQ               |              | 0.42   |              |
| malonyl-CoA               | n.d. <sup>c</sup> | WT            | 18.74              | 0.408        | 2.60   | 0.345        |
|                           |                   | Δ <i>fakA</i> | 15.99              |              | 3.22   |              |
| Succinate                 | 80.67             | WT            | 58.22              | 0.388        | 191.81 | 0.142        |
|                           |                   | Δ <i>fakA</i> | 48.18              |              | 247.46 |              |

<sup>a</sup>Quantification of selected organic acids by LC/MS/MS of sterile media before inoculation or cells after three and six hours of growth in TSB + 14 mM glucose.

<sup>b</sup>values are in nM per mg protein. Statistically-significant differences are marked by underline. BLOQ indicates below limit of quantification.

<sup>c</sup>not determined

**Table S2. Quantification of cellular nucleotides**

| Nucleotide <sup>a</sup> | 3 hrs           |                            |                       |         | 6 hrs           |                            |                       |         |
|-------------------------|-----------------|----------------------------|-----------------------|---------|-----------------|----------------------------|-----------------------|---------|
|                         | WT <sup>b</sup> | $\Delta fakA$ <sup>b</sup> | % change <sup>c</sup> | P-value | WT <sup>b</sup> | $\Delta fakA$ <sup>b</sup> | % change <sup>c</sup> | P-value |
| NAM                     | 1.42            | 3.88                       |                       |         | 1.13            | 1.18                       |                       |         |
| NMN                     | 0.38            | 0.12                       | -68.6                 | 0.001   | 0.20            | 0.21                       |                       |         |
| NAD                     | 46.84           | 28.18                      | -39.8                 | 0.005   | 40.99           | 52.39                      |                       |         |
| NADP                    | 2.86            | 2.04                       |                       |         | 1.96            | 3.13                       | 60.1                  | 0.002   |
| AMP                     | 70.26           | 71.47                      |                       |         | 32.67           | 59.03                      | 80.7                  | 0.004   |
| ADP                     | 18.25           | 17.20                      |                       |         | 7.97            | 12.20                      | 53.0                  | 0.017   |
| ADPR                    | 11.97           | 18.55                      | 55.0                  | 0.005   | 5.57            | 2.55                       | -54.2                 | 0.011   |
| ATP                     | 6.52            | 6.09                       |                       |         | 1.92            | 3.22                       | 67.2                  | 0.015   |
| GMP                     | 14.58           | 10.27                      | -29.5                 | 0.007   | 9.40            | 18.57                      | 97.5                  | 0.005   |
| GDP                     | 15.39           | 10.44                      | -32.1                 | 0.001   | 6.34            | 9.89                       | 56.1                  | 0.013   |
| GTP                     | 3.61            | 2.19                       | -39.2                 | 0.002   | 1.32            | 1.67                       |                       |         |
| CMP                     | 7.55            | 6.18                       | -18.1                 | 0.015   | 6.46            | 12.79                      | 97.9                  | 0.006   |
| CDP                     | 1.66            | 1.03                       | -37.9                 | 0.032   | 1.07            | 1.78                       | 66.6                  | 0.018   |
| CTP                     | 0.87            | 0.47                       | -45.2                 | 0.001   | 0.30            | 0.47                       | 56.1                  | 0.029   |
| UMP                     | 15.80           | 19.20                      | 21.5                  | 0.014   | 8.46            | 20.08                      | 137.3                 | 0.009   |
| UDP                     | 18.36           | 19.73                      |                       |         | 8.57            | 13.73                      | 60.2                  | 0.009   |
| TMP                     | 5.17            | 5.37                       |                       |         | 2.92            | 14.77                      | 406.6                 | 0.021   |
| TDP                     | 3.57            | 4.91                       | 37.3                  | 0.002   | 1.43            | 4.64                       | 224.9                 | 0.004   |
| TTP                     | 0.80            | 0.85                       |                       |         | 0.21            | 0.76                       | 253.4                 | 0.002   |
| IMP                     | 10.58           | 8.22                       | -22.4                 | 0.033   | 1.38            | 4.95                       | 258.3                 | 0.005   |
| IDP                     | 0.36            | 0.16                       | -57.2                 | 0.003   | 0.04            | 0.03                       |                       |         |
| ITP                     | 0.54            | 0.23                       | -58.0                 | 0.008   | 0.06            | 0.05                       |                       |         |
| NADH                    | 36.50           | 42.00                      |                       |         | 19.60           | 14.32                      | -26.9                 | 0.007   |
| NADPH                   | 1.16            | 0.77                       | -33.6                 | 0.021   | 0.69            | 0.63                       |                       |         |
| NAD/NADH                | 1.37            | 0.67                       | -51.0                 | 0.020   | 2.12            | 3.70                       | 74.2                  | 0.013   |
| NADP/NADPH              | 2.47            | 2.66                       |                       |         | 2.84            | 5.01                       | 76.3                  | 0.001   |

<sup>a</sup>Quantified using LC/MS/MS from cells collected after three or six hours of growth in TSB + 14 mM glucose.

<sup>b</sup>Shown as nM per mg protein, except for NAD/NADH and NADP/NADPH (shown as ratio).

<sup>c</sup>Change in mutant from wild-type (WT) strain, red box denotes a decrease in mutant while green identifies an increase in mutant. Only those with significant differences ( $p < 0.05$ ) are shown.

**Table S3. Quantification of extracellular amino acids**

| Amino acid    | Media <sup>a</sup> | Strain        | Supernatant <sup>b</sup> |              |         |              |
|---------------|--------------------|---------------|--------------------------|--------------|---------|--------------|
|               |                    |               | 3h                       | P-value      | 6h      | P-value      |
| Alanine       | 2692.08            | WT            | 594.03                   | 0.256        | 382.43  | <u>0.002</u> |
|               |                    | $\Delta fakA$ | 988.13                   |              | 72.20   |              |
| Arginine      | 1616.45            | WT            | 901.83                   | 0.528        | 916.62  | 0.547        |
|               |                    | $\Delta fakA$ | 1114.91                  |              | 604.18  |              |
| Asparagine    | 870.91             | WT            | 39.85                    | <u>0.036</u> | 22.43   | 0.313        |
|               |                    | $\Delta fakA$ | 75.96                    |              | 19.39   |              |
| Aspartate     | 602.03             | WT            | 162.84                   | 0.567        | 193.21  | <u>0.007</u> |
|               |                    | $\Delta fakA$ | 198.94                   |              | 3.66    |              |
| Citruline     | 20.01              | WT            | 19.46                    | 0.428        | 26.68   | 0.283        |
|               |                    | $\Delta fakA$ | 12.39                    |              | 19.50   |              |
| Glutamate     | 2387.40            | WT            | 489.98                   | 0.265        | 257.68  | 0.085        |
|               |                    | $\Delta fakA$ | 842.71                   |              | 19.87   |              |
| Glutamine     | 542.46             | WT            | BLOQ                     |              | BLOQ    |              |
|               |                    | $\Delta fakA$ | 2.47                     |              | BLOQ    |              |
| Glycine       | 758.59             | WT            | 111.32                   | 0.729        | 25.32   | 0.369        |
|               |                    | $\Delta fakA$ | 87.15                    |              | 7.65    |              |
| Histidine     | 567.36             | WT            | 246.92                   | 0.253        | 218.62  | 0.591        |
|               |                    | $\Delta fakA$ | 344.32                   |              | 143.46  |              |
| Isoleucine    | 1539.47            | WT            | 575.56                   | 0.167        | 433.75  | 0.901        |
|               |                    | $\Delta fakA$ | 895.23                   |              | 403.93  |              |
| Leucine       | 7071.18            | WT            | 2870.56                  | 0.329        | 2322.54 | 0.576        |
|               |                    | $\Delta fakA$ | 3832.42                  |              | 1672.32 |              |
| Lysine        | 6442.79            | WT            | 1662.38                  | 0.352        | 1381.47 | 0.531        |
|               |                    | $\Delta fakA$ | 2189.76                  |              | 923.10  |              |
| Ornithine     | 51.92              | WT            | 30.25                    | 0.151        | 43.70   | 0.569        |
|               |                    | $\Delta fakA$ | 23.79                    |              | 49.01   |              |
| Methionine    | 1318.28            | WT            | 443.97                   | 0.659        | 385.42  | 0.383        |
|               |                    | $\Delta fakA$ | 679.39                   |              | 261.61  |              |
| Phenylalanine | 1910.52            | WT            | 1004.86                  | 0.744        | 1012.08 | 0.494        |
|               |                    | $\Delta fakA$ | 1122.32                  |              | 673.73  |              |
| Proline       | 398.74             | WT            | 183.10                   | 0.446        | 193.10  | 0.670        |
|               |                    | $\Delta fakA$ | 248.13                   |              | 232.58  |              |
| Serine        | 1544.93            | WT            | 56.55                    | <u>0.005</u> | 15.82   | 0.174        |
|               |                    | $\Delta fakA$ | 171.51                   |              | 4.17    |              |
| Threonine     | 1453.77            | WT            | 119.45                   | <u>0.049</u> | 26.46   | 0.365        |
|               |                    | $\Delta fakA$ | 473.13                   |              | 0.97    |              |
| Tryptophan    | 551.52             | WT            | 248.25                   | 0.617        | 253.99  | 0.681        |
|               |                    | $\Delta fakA$ | 293.05                   |              | 196.59  |              |
| Tyrosine      | 563.59             | WT            | 207.77                   | 0.218        | 213.68  | 0.724        |
|               |                    | $\Delta fakA$ | 317.66                   |              | 167.61  |              |
| Valine        | 2717.28            | WT            | 1184.58                  | 0.430        | 1104.39 | 0.742        |
|               |                    | $\Delta fakA$ | 1545.04                  |              | 883.73  |              |

<sup>a</sup>µM concentration of sterile media determined by LC/MS/MS.

<sup>b</sup>µM concentration determined by LC/MS/MS and normalized to relative optical density. Statistically-significant differences are marked with an underline. BLOQ indicates below limit of quantification.
